# Supplementary material for: Involvement of Oxytocin and Progesterone Receptor Expression in the Etiology of Canine Uterine Inertia
Source: MDPI journal article supplement (doi:10.3390/ijms232113601), 2022-11-06
Supplement: s1 [file s1]

## Supplementary Materials

Statistical analysis of OXTR and PGR staining intensity in IHC.

**Table S1.** Statistical analysis of OXTR-immunopositive staining. Comparison of layers: longitudinal versus circular myometrial layer differentiated in interplacental (IP) and uteroplacental (UP) tissue. Groups (primary uterine inertia, PUI; obstructive dystocia, OD) are presented individually and summarized.

|         | Group    | <i>p</i> -Value<br>(Wilcoxon Matched-Pairs Signed Rank Test) |
|---------|----------|--------------------------------------------------------------|
| IP      | PUI      | $p = 0.0156$                                                 |
|         | OD       | $p = 0.0156$                                                 |
|         | PUI + OD | $p = 0.0001$                                                 |
| UP      | PUI      | $p = 0.5$                                                    |
|         | OD       | $p = 0.5$                                                    |
|         | PUI + OD | $p = 0.0769$                                                 |
| IP + UP | PUI + OD | $p = < 0.0001$                                               |

**Table S2.** Statistical analysis of OXTR-immunopositive staining in interplacental (IP) tissue. Comparison of groups (primary uterine inertia, PUI, versus obstructive dystocia, OD) for each specific myometrial layer (longitudinal/circular) and the combined IP-Myoscore.

|    | Myometrial Layer | Groups for Comparison | <i>p</i> -Value<br>(Mann–Whitney Test) |
|----|------------------|-----------------------|----------------------------------------|
| IP | Longitudinal     | PUI vs. OD            | $p = 0.2941$                           |
|    |                  | PUI-N vs. OD          | $p = 0.1939$                           |
| IP | Circular         | PUI vs. OD            | $p = 0.4199$                           |
|    |                  | PUI-N vs. OD          | $p = 0.8869$                           |
| IP | Myoscore         | PUI vs. OD            | $p = 0.5320$                           |
|    |                  | PUI-N vs. OD          | $p = 0.2796$                           |

**Table S3.** Effect of litter size in the primary uterine inertia (PUI) group on OXTR-immunopositive staining in IP tissue differentiating the myometrial layer (longitudinal/circular). PUI bitches with normal litter size (PUI-N, average litter size of the respective breed  $\pm 1$  standard deviation) were compared with litters smaller (PUI-S,  $< -1$  SD) or larger (PUI-L,  $> +1$  SD) than the breed average.

|    | Myometrial Layer | Groups for Comparison     | <i>p</i> -Value<br>(Kruskal–Wallis Test) |
|----|------------------|---------------------------|------------------------------------------|
| IP | Longitudinal     | PUI-S vs. PUI-N vs. PUI-L | $p = 0.2346$                             |
| IP | Circular         | PUI-S vs. PUI-N vs. PUI-L | $p = 0.7273$                             |
| IP | Myoscore         | PUI-S vs. PUI-N vs. PUI-L | $p = 0.655$                              |

Statistical analysis of PGR staining intensity in IHC.

**Table S4.** Statistical analysis of PGR-immunopositive staining. Comparison of layers: longitudinal versus circular myometrial layer differentiating interplacental (IP) and uteroplacental (UP) tissue. Groups (primary uterine inertia, PUI; obstructive dystocia, OD) were presented individually and summarized.

|  | Group | <i>p</i> -Value<br>(Wilcoxon Matched-Pairs Signed Rank Test) |
|--|-------|--------------------------------------------------------------|
|  |       |                                                              |

|        |          |                        |
|--------|----------|------------------------|
| IP     | PUI      | $p = 0.625$            |
|        | OD       | $p \Rightarrow 0.9999$ |
|        | PUI + OD | $p = 0.4531$           |
| UP     | PUI      | $p = 0.5472$           |
|        | OD       | $p \Rightarrow 0.9999$ |
|        | PUI + OD | $p = 0.6127$           |
| IP+ UP | PUI + OD | $p = 0.8462$           |

**Table S5.** Statistical analysis of PGR-immunopositive staining in interplacental (IP) samples. Comparison of groups (primary uterine inertia, PUI, versus obstructive dystocia, OD) depending on localization (interplacental, IP; uteroplacenta, UP) and specific myometrial layer (longitudinal/circular) or combined IP-Myoscore.

|    | Myometrial Layer | Groups for Comparison | $p$ -Value<br>(Mann–Whitney Test) |
|----|------------------|-----------------------|-----------------------------------|
| IP | Longitudinal     | PUI vs. OD            | $p = 0.1323$                      |
|    |                  | PUI-N vs. OD          | $p = 0.097$                       |
| IP | Circular         | PUI vs. OD            | $p = 0.1161$                      |
|    |                  | PUI-N vs. OD          | $p = 0.1455$                      |
| IP | Myoscore         | PUI vs. OD            | $p = 0.0716$                      |
|    |                  | PUI-N vs. OD          | $p = 0.0626$                      |

**Table S6.** Effect of litter size on PGR-immunopositive staining in interplacental (IP) samples of the primary uterine inertia (PUI) group differentiating the myometrial layers (longitudinal/circular). PUI bitches with normal litter size (PUI-N, average litter size of the respective breed  $\pm 1$  standard deviation) were compared with litters smaller (PUI-S,  $< -1$  SD) or larger (PUI-L,  $> +1$  SD) than the breed average.

|    | Myometrial Layer | Groups for Comparison     | $p$ -Value<br>(Kruskal–Wallis Test Followed by<br>Tukey’s Multiple Comparisons) |
|----|------------------|---------------------------|---------------------------------------------------------------------------------|
| IP | Longitudinal     | PUI-S vs. PUI-N vs. PUI-L | $p = 0.0306$                                                                    |
| IP | Circular         | PUI-S vs. PUI-N vs. PUI-L | $p = 0.1984$                                                                    |
| IP | Myoscore         | PUI-S vs. PUI-N vs. PUI-L | $p = 0.0391$                                                                    |
